# Supplementary figures and images for: Genome Analysis of a Novel Clade b Betabaculovirus Isolated from the Legume Pest Matsumuraeses phaseoli (Lepidoptera: Tortricidae)
Source: MDPI journal article supplement (doi:10.3390/v12101068), 2020-09-23

# SNP of the sequenced MaphGV isolate

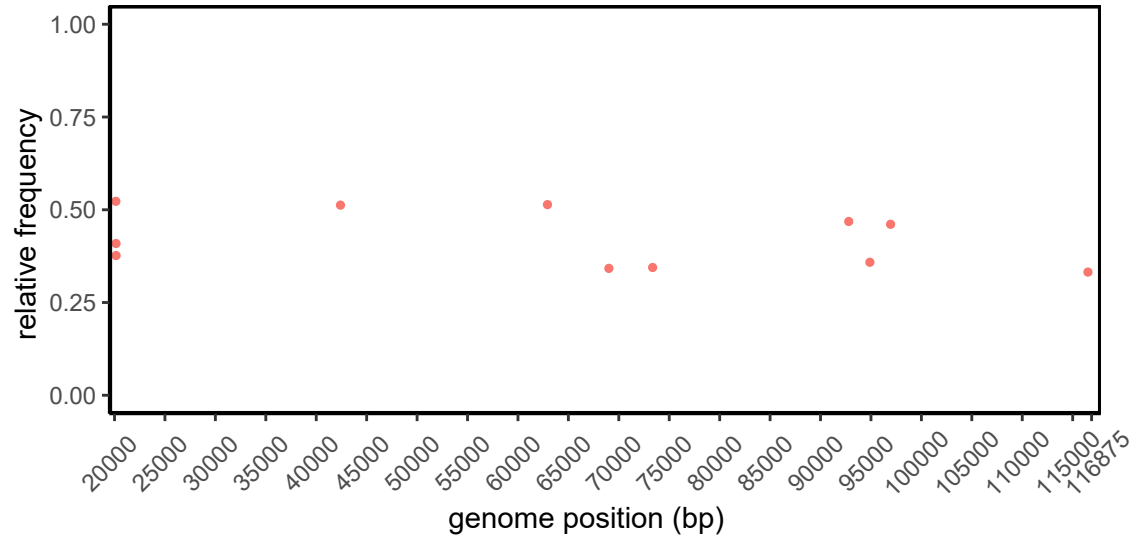

Supplement: s1 [file s1]
